# Supplementary material for: Polyphenolic Extract from Tarocco (Citrus sinensis L. Osbeck) Clone “Lempso” Exerts Anti-Inflammatory and Antioxidant Effects via NF-kB and Nrf-2 Activation in Murine Macrophages
Source: PubMed Central journal article supplement (PMC6316643; doi:10.3390/nu10121961), 2018-12-11
Supplement: nutrients-10-01961-s001.pdf [file nutrients-10-01961-s001.pdf]

Supporting material for the manuscript:

## Polyphenolic extract from Tarocco (*Citrus sinensis* L. Osbeck) clone “Lempso” exerts anti-inflammatory and antioxidant effects via NF- $\kappa$ B and Nrf-2 activation in macrophages

**Table S1.** Quantitative polyphenol profile of Lempso extract

| Compound                                                         | mg g <sup>-1</sup> |
|------------------------------------------------------------------|--------------------|
| <b>Methoxy-Hydroxycinnamic Acids and Flavonoids</b>              |                    |
| p-Coumaroyl glucose                                              | 1.35 ± 0.05        |
| Quercetin 3,4'-di-O- $\beta$ -glucopyranoside                    | 2.06 ± 0.25        |
| Quercetin 7-O-glucoside-3-O-rutinoside                           | 2.19 ± 0.09        |
| Ferulic acid 4-O-glucoside                                       | 1.55 ± 0.05        |
| 5-8'-Dehydrodiferulic acid                                       | 1.59 ± 0.09        |
| p-coumaric (derivate)                                            | 1.43 ± 0.07        |
| Apigenin 6,8-di-C-glucoside (Vicenin-2)                          | 14.40 ± 0.09       |
| Naringenin 7- O -glucoside (Prunin)                              | 6.40 ± 0.19        |
| Apigenin 7- O -apoyosil glucoside (Apiin)                        | 2.83 ± 0.15        |
| Quercetin 3- O -rutinoside (Rutin)                               | 7.13 ± 0.11        |
| Naringenin 7- O -rutinoside (Narirutin)                          | 18.15 ± 0.40       |
| Quercetin-3-[6 “-(3-hydroxy-3-methylglutaryl)] $\beta$ -hexoside | 0.73 ± 0.06        |
| Isorhamnetin 3-O-glucoside 7-O-rhamnoside                        | 1.89 ± 0.25        |
| Hesperidin                                                       | 179.51 ± 1.54      |
| Isosakuranetin 7-rutinoside (Dydimin)                            | 4.61 ± 0.04        |
| <b>Anthocyanins</b>                                              |                    |
| Cyanidin 3,5-diglucoside                                         | 0.17 ± 0.01        |
| Cyanidin 3-sophoroside                                           | 0.16 ± 0.01        |
| Delphinidin 3-O-glucoside                                        | 0.21 ± 0.01        |
| Cyanidin 3-O-glucoside                                           | 2.00 ± 0.04        |
| Delphinidin-3-O-glucoside (Isomer)                               | 0.13 ± 0.01        |
| Peonidin 3-O-glucoside                                           | 0.26 ± 0.01        |
| Cyanidin-3-O-(6' malonyl glucoside)                              | 2.63 ± 0.05        |

Data are reported as mean  $\pm$  standard deviation values of at least three independent experiments.
